# Supplementary material for: Remarkable photoluminescence enhancement of ZnS–AgInS2 solid solution nanoparticles by post-synthesis treatment
Source: Royal Society of Chemistry journal article supplement (doi:10.1039/b924186h), 2010-01-01
Supplement: b924186h.pdf [file b924186h.pdf]

## Supporting Information

# Remarkable Photoluminescence Enhancement of ZnS-AgInS<sub>2</sub> Solid Solution Nanoparticles by Post-synthesis Treatment

Tsukasa Torimoto,<sup>a,e\*</sup> Shoji Ogawa,<sup>a</sup> Tomohiro Adachi,<sup>a</sup> Tatsuya Kameyama,<sup>a</sup> Ken-ichi Okazaki,<sup>a</sup> Tamaki Shibayama,<sup>b</sup> Akihiko Kudo<sup>c</sup> and Susumu Kuwabata<sup>d,e</sup>

<sup>a</sup>Graduate School of Engineering, Nagoya University, Chikusa-ku, Nagoya 464-8603, Japan.  
Fax: +81-52-789-5299; Tel: +81-52-789-4614; E-mail: torimoto@apchem.nagoya-u.ac.jp

<sup>b</sup>Center for Advanced Research of Energy Conversion Materials, Hokkaido University, Sapporo 060-8628, Japan.

<sup>c</sup>Faculty of Science, Tokyo University of Science, 1-3 Kagurazaka, Shinjuku-ku, Tokyo 162-8601, Japan.

<sup>d</sup>Graduate School of Engineering, Osaka University, Suita, Osaka 565-0871, Japan.

<sup>e</sup>Japan Science & Technology Agency, CREST, Kawaguchi, Saitama, 3320012, Japan.

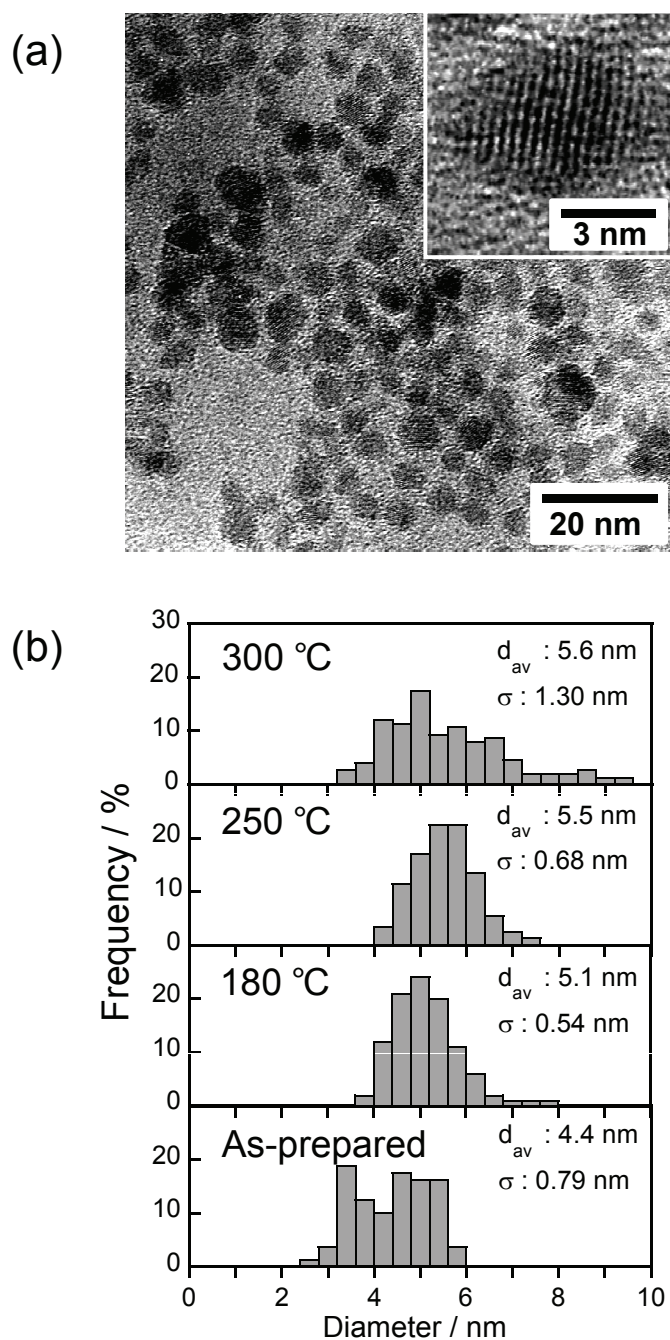

**Fig. S1** (a) A typical TEM image of ZAIS nanoparticles ( $x=1.0$ ) heat-treated at 250 °C for 30 min. The inset show a high magnification image of an individual particle. (b) Size distribution of ZAIS nanoparticles ( $x=1.0$ ) heat-treated at various temperatures.

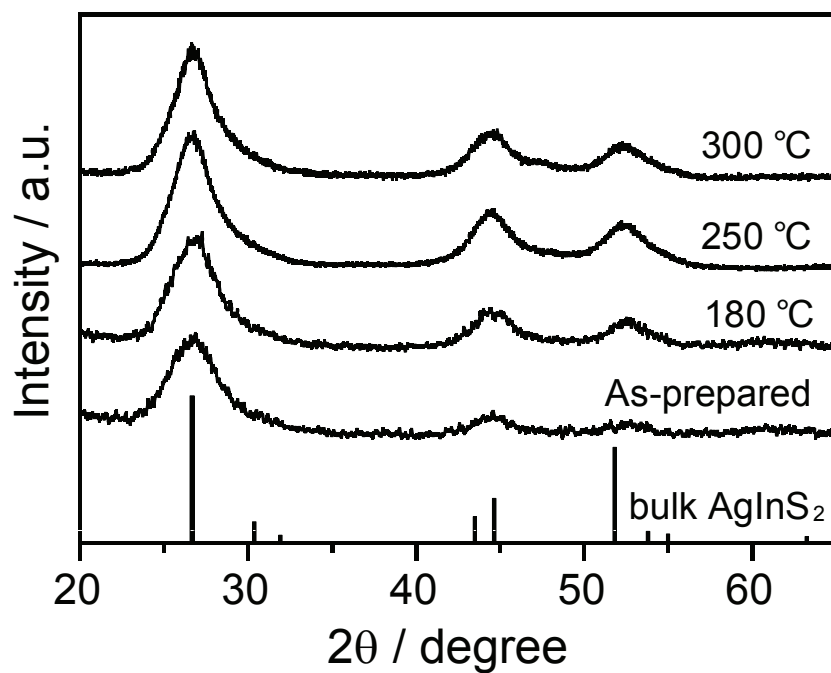

**Fig. S2** X-ray diffraction patterns of ZAIS nanoparticles ( $x = 1.0$ ) heat-treated at various temperatures. A reference pattern of tetragonal  $\text{AgInS}_2$  crystal structure is also shown.

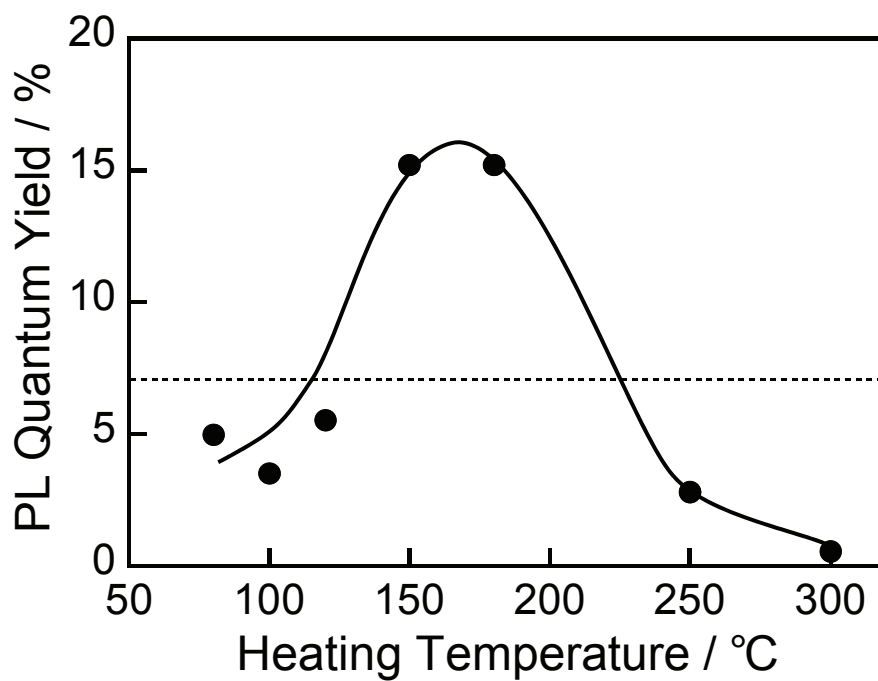

**Fig. S3** Relationship between post-heat-treatment temperature and PL quantum yield of ZAIS nanoparticles ( $x=1.0$ ). A Dotted line indicates PL quantum yield of as-prepared particles.
